# Supplementary material for: Functional Brain Connectivity and Neurocognitive Functioning in Patients With Long-Standing Type 1 Diabetes With and Without Microvascular Complications
Source: Oxford University Press journal article supplement (doi:10.2337/db09-0425), 2009-07-07
Supplement: db09-0425_online_appendix.doc [file db09-0425_online_appendix.doc]

**Table 1A.** Repeated measures ANCOVA for MEG measures compared T1DM groups as one to the healthy control group. Interaction effect *P*-values are Greenhouse-Geisser values corrected for degrees of freedom

|  | *P*-value (interaction) | *P*-value (main effect) |
| --- | --- | --- |
| Delta frequency band: |  |  |
| - Intra hemispheric | 0.867 | 0.768 |
| - Inter hemispheric | 0.023* | 0.795 |
| - Local hemispheric | 0.267 | 0.290 |
| Theta frequency band: |  |  |
| - Intra hemispheric | 0.635 | 0.629 |
| - Inter hemispheric | 0.438 | 0.385 |
| - Local hemispheric | 0.511 | 0.242 |
| Lower alpha frequency band: |  |  |
| - Intra hemispheric | 0.459 | 0.839 |
| - Inter hemispheric | 0.617 | 0.770 |
| - Local hemispheric | 0.846 | 0.943 |
| Upper alpha frequency band: |  |  |
| - Intra hemispheric | 0.639 | 0.572 |
| - Inter hemispheric | 0.907 | 0.082 |
| - Local hemispheric | 0.720 | 0.346 |
| Beta frequency band: |  |  |
| - Intra hemispheric | 0.955 | 0.835 |
| - Inter hemispheric | 0.874 | 0.605 |
| - Local hemispheric | 0.663 | 0.894 |
| Lower gamma frequency band: |  |  |
| - Intra hemispheric | 0.970 | 0.918 |
| - Inter hemispheric | 0.634 | 0.708 |
| - Local hemispheric | 0.857 | 0.752 |
| Upper gamma frequency band: |  |  |
| - Intra hemispheric | 0.357 | 0.697 |
| - Inter hemispheric | 0.322 | 0.706 |
| - Local hemispheric | 0.770 | 0.686 |

A * indicates differences between groups with *P*-value less than 0.05.

**Table 1B.** MANCOVA for cognitive domains comparing the diabetes groups as one group to healthy controls

|  | *P­­*-values |
| --- | --- |
| Memory | 0.620 |
| Information processing speed | 0.027* |
| Executive functions | 0.780 |
| Attention | 0.068 |
| Motor speed | 0.030* |
| General cognitive ability | 0.022* |

A * indicates differences between groups with *P*-value less than 0.05

**Table 2A.** Results of between patient groups analysis for MEG with and without correction of severe hypoglycemic events. *P*-values are given, values in italic indicate significant results in the original analysis

|  | Original analysis | Corrected for age of onset and diabetes duration |
| --- | --- | --- |
| Theta band local: |  |  |
| - Left C | *0.010* | 0.009+ |
| - Left F | 0.212 | 0.205 |
| - Left O | 0.570 | 0.586 |
| - Left P | *0.008* | 0.008+ |
| - Left T | 0.553 | 0.496 |
| - Right C | *0.014* | 0.016+ |
| - Right F | 0.602 | 0.536 |
| - Right O | 0.403 | 0.433 |
| - Right P | *0.015* | 0.015+ |
| - Right T | 0.181 | 0.220 |
| Lower alpha intra: |  |  |
| - Left FP | 0.062 | 0.058 |
| - Left FT | *0.042* | 0.043+ |
| - Left PO | *0.018* | 0.013+ |
| - Left TO | 0.349 | 0.300 |
| - Right FP | 0.139 | 0.130 |
| - Right FT | 0.200 | 0.187 |
| - Right PO | *0.004* | 0.002+ |
| - Right TO | *0.050* | 0.044+ |
| Lower alpha local: |  |  |
| - Left C | *0.001* | 0.002+ |
| - Left F | *0.039* | 0.049+ |
| - Left O | 0.377 | 0.332 |
| - Left P | *0.003* | 0.003+ |
| - Left T | 0.312 | 0.264 |
| - Right C | *0.005* | 0.006+ |
| - Right F | 0.060 | 0.058 |
| - Right O | 0.108 | 0.089 |
| - Right P | *0.002* | 0.002+ |
| - Right T | 0.186 | 0.162 |
| Upper alpha local: |  |  |
| - Left C | 0.074 | 0.082 |
| - Left F | 0.063 | 0.075 |
| - Left O | 0.846 | 0.863 |
| - Left P | *0.038* | 0.043+ |
| - Left T | 0.793 | 0.728 |
| - Right C | *0.035* | 0.037+ |
| - Right F | 0.100 | 0.098 |
| - Right O | 0.848 | 0.945 |
| - Right P | *0.012* | 0.014+ |
| - Right T | 0.763 | 0.796 |
| Beta inter: |  |  |
| - Inter C | 0.221 | 0.259 |
| - Inter F | 0.371 | 0.372 |
| - Inter O | 0.980 | 0.896 |
| - Inter P | 0.094 | 0.097 |
| - Inter T | 0.444 | 0.501 |
| Beta local: |  |  |
| - Left C | 0.127 | 0.155 |
| - Left F | 0.191 | 0.204 |
| - Left O | 0.942 | 0.840 |
| - Left P | 0.063 | 0.074 |
| - Left T | 0.711 | 0.685 |
| - Right C | 0.153 | 0.185 |
| - Right F | 0.692 | 0.644 |
| - Right O | 0.879 | 0.735 |
| - Right P | *0.043* | 0.055# |

A + indicates significant results in both the original as well as the corrected analysis. Values indicated with * indicate significant results in the analysis corrected for age of onset and diabetes duration as compared the analysis not correct for age of onset and diabetes duration. # indicates significant in the original analysis but not in the corrected analysis.

**Table 2B.** Results of between patient group analyses with and without correction for severe hypoglycemic events. *P*-values are given for T1DM+ vs T1DM-

|  | Original analysis | Corrected for age of onset and diabetes duration |
| --- | --- | --- |
| Memory | 0.723 | 0.728 |
| Information processing speed | 0.323 | 0.320 |
| Executive functions | 0.215 | 0.203 |
| Attention | 0.477 | 0.450 |
| Motor speed | 0.203 | 0.198 |
| General cognitive ability | 0.563 | 0.568 |

**Table 2C.** Correlations between significant decreased and increased MEG areas and decreased cognitive domains for T1DM+ and T1DM- patients and severe hypoglycemic events

|  | Pearson’s correlation | *P*-value |
| --- | --- | --- |
| T1DM+ | | |
| Cognitive domains: |  |  |
| - Information processing speed | 0.080 | 0.776 |
| - Motor speed | 0.023 | 0.936 |
| - General cognitive ability | 0.104 | 0.712 |
| MEG areas: |  |  |
| - Theta left central | 0.350 | 0.201 |
| - Theta left parietal | 0.173 | 0.538 |
| - Theta right central | 0.269 | 0.333 |
| - Theta right parietal | 0.235 | 0.400 |
| - Lower alpha left fronto-temporal | 0.305 | 0.268 |
| - Lower alpha left parieto-occipital | -0.224 | 0.422 |
| - Lower alpha right parieto-occipital | -0.150 | 0.594 |
| - Lower alpha right temporo-occipital | 0.222 | 0.427 |
| - Lower alpha left central | 0.148 | 0.598 |
| - Lower alpha left frontal | 0.226 | 0.417 |
| - Lower alpha left parietal | -0.137 | 0.625 |
| - Lower alpha right central | 0.049 | 0.864 |
| - Lower alpha right parietal | 0.043 | 0.879 |
| - Upper alpha left frontal | 0.092 | 0.746 |
| - Upper alpha left parietal | -0.163 | 0.560 |
| - Upper alpha right central | 0.047 | 0.869 |
| - Upper alpha right frontal | -0.036 | 0.900 |
| - Upper alpha right parietal | -0.007 | 0.980 |
| - Beta inter parietal | 0.329 | 0.231 |
| - Beta left parietal | 0.168 | 0.550 |
| - Beta right central | 0.374 | 0.170 |
| - Beta right parietal | 0.277 | 0.318 |
| T1DM- | | |
| Cognitive domains: |  |  |
| - Information processing speed | 0.050 | 0.795 |
| - Motor speed | 0.103 | 0.596 |
| - General cognitive ability | -0.112 | 0.564 |
| MEG areas: |  |  |
| - Lower alpha right parieto-occipital | -0.071 | 0.713 |

**Table 3A.** Results of between patient group analyses with and without correction for age of onset and diabetes duration. *P*-values are given for T1DM+ vs T1DM-

|  | Original analysis | Corrected for age of onset and diabetes duration |
| --- | --- | --- |
| Memory | 0.723 | 0.427 |
| Information processing speed | 0.323 | 0.266 |
| Executive functions | 0.215 | 0.111 |
| Attention | 0.477 | 0.285 |
| Motor speed | 0.203 | 0.721 |
| General cognitive ability | 0.563 | 0.841 |

**Table 3B.** Results of between patient groups analysis for MEG with and without age of onset and diabetes duration. *P*-values are given, values in italic indicate significant results in the original analysis

|  | Original analysis | Corrected for age of onset and diabetes duration |
| --- | --- | --- |
| Theta band local: |  |  |
| - Left C | *0.010* | 0.029+ |
| - Left F | 0.212 | 0.236 |
| - Left O | 0.570 | 0.349 |
| - Left P | *0.008* | 0.008+ |
| - Left T | 0.553 | 0.307 |
| - Right C | *0.014* | 0.019+ |
| - Right F | 0.602 | 0.280 |
| - Right O | 0.403 | 0.746 |
| - Right P | *0.015* | 0.029+ |
| - Right T | 0.181 | 0.363 |
| Lower alpha intra: |  |  |
| - Left FP | 0.062 | 0.045* |
| - Left FT | *0.042* | 0.107# |
| - Left PO | *0.018* | 0.012+ |
| - Left TO | 0.349 | 0.144 |
| - Right FP | 0.139 | 0.268 |
| - Right FT | 0.200 | 0.067 |
| - Right PO | *0.004* | 0.029+ |
| - Right TO | *0.050* | 0.142# |
| Lower alpha local: |  |  |
| - Left C | *0.001* | 0.004+ |
| - Left F | *0.039* | 0.047+ |
| - Left O | 0.377 | 0.143 |
| - Left P | *0.003* | 0.006+ |
| - Left T | 0.312 | 0.289 |
| - Right C | *0.005* | 0.008+ |
| - Right F | 0.060 | 0.005* |
| - Right O | 0.108 | 0.091 |
| - Right P | *0.002* | 0.016+ |
| - Right T | 0.186 | 0.137 |
| Upper alpha local: |  |  |
| - Left C | 0.074 | 0.040* |
| - Left F | 0.063 | 0.033* |
| - Left O | 0.846 | 0.185 |
| - Left P | *0.038* | 0.020+ |
| - Left T | 0.793 | 0.654 |
| - Right C | *0.035* | 0.013+ |
| - Right F | 0.100 | 0.007* |
| - Right O | 0.848 | 0.428 |
| - Right P | *0.012* | 0.007+ |
| - Right T | 0.763 | 0.918 |
| Beta inter: |  |  |
| - Inter C | 0.221 | 0.287 |
| - Inter F | 0.371 | 0.235 |
| - Inter O | 0.980 | 0.575 |
| - Inter P | 0.094 | 0.058 |
| - Inter T | 0.444 | 0.736 |
| Beta local: |  |  |
| - Left C | 0.127 | 0.204 |
| - Left F | 0.191 | 0.185 |
| - Left O | 0.942 | 0.246 |
| - Left P | 0.063 | 0.071 |
| - Left T | 0.711 | 0.570 |
| - Right C | 0.153 | 0.149 |
| - Right F | 0.692 | 0.379 |
| - Right O | 0.879 | 0.439 |
| - Right P | *0.043* | 0.076# |
| - Right T | 0.443 | 0.663 |

A + indicates significant results in both the original as well as the corrected analysis. Values indicated with * indicate significant results in the analysis corrected for age of onset and diabetes duration as compared the analysis not correct for age of onset and diabetes duration. # indicates significant in the original analysis but not in the corrected analysis.

**Table 3C.** Repeated measures ANCOVA for T1DM patient groups with and without correction for disease variables age of onset and disease duration. *P*-values are presented with values in italic indicating significant results in the original analysis. Values indicate interaction/main effects

|  | Original analysis | Corrected for age of onset and diabetes duration |
| --- | --- | --- |
| Delta band: |  |  |
| - Intra | 0.323/0.743 | 0.547/0.173 |
| - Inter | 0.213/0.270 | 0.128/0.197 |
| - Local | 0.265/0.194 | 0.339/0.064 |
| Theta band: |  |  |
| - Intra | 0.215/0.919 | 0.232/0.326 |
| - Inter | 0.080/0.248 | 0.419/0.061 |
| - Local | *0.001*/0.157 | 0.026*+*/0.072 |
| Lower alpha band: |  |  |
| - Intra | 0.053/*0.011* | 0.308/0.021+ |
| - Inter | 0.445/0.058 | 0.357/0.042* |
| - Local | *0.004*/*0.003* | 0.050+/0.004+ |
| Upper alpha band: |  |  |
| - Intra | 0.319/0.155 | 0.286/0.019* |
| - Inter | 0.339/0.544 | 0.123/0.034* |
| - Local | *0.008*/0.075 | 0.011+/0.016* |
| Beta band: |  |  |
| - Intra | 0.062/0.842 | 0.049*/0.432 |
| - Inter | 0.076/0.440 | 0.132/0.282 |
| - Local | 0.077/0.246 | 0.182/0.168 |
| Lower gamma band: |  |  |
| - Intra | 0.896/0.278 | 0.880/0.560 |
| - Inter | 0.782/0.0715 | 0.711/0.806 |
| - Local | 0.871/0.633 | 0.801/0.752 |
| Upper gamma band: |  |  |
| - Intra | 0.201/0.906 | 0.704/0.808 |
| - Inter | 0.709/0.692 | 0.381/0.936 |
| - Local | 0.682/0.891 | 0.875/0.974 |

A + indicates significant results in both the original as well as the corrected analysis. Values indicated with * indicate significant results in the analysis corrected for age of onset and diabetes duration as compared the analysis not correct for age of onset and diabetes duration.

**Table 4.** Mean SL-values for T1DM- patients and healthy controls for all areas of the lower alpha band

|  | T1DM- | Healthy controls |
| --- | --- | --- |
| Intra left fronto-parietal | 0,0255# | 0,0236 |
| Intra left fronto-temporal | 0,0331# | 0,0320 |
| Intra left parieto-occipital | 0,0473# | 0,0450 |
| Intra left temporo-occipital | 0,0324# | 0,0309 |
| Intra right fronto-parietal | 0,0235 | 0,0237 |
| Intra right fronto-temporal | 0,0352# | 0,0349 |
| Intra right parieto-occipital | 0,0483# | 0,0401 |
| Intra right temporo-occipital | 0,0291# | 0,0286 |
| Inter central | 0,0330# | 0,0319 |
| Inter frontal | 0,0356# | 0,0332 |
| Inter occipital | 0,0501# | 0,0467 |
| Inter parietal | 0,0435# | 0,0411 |
| Inter temporal | 0,0327 | 0,0335 |
| Local left central | 0,1237# | 0,1183 |
| Local left frontal | 0,1178# | 0,1166 |
| Local left occipital | 0,1431# | 0,1382 |
| Local left parietal | 0,2336# | 0,2259 |
| Local left temporal | 0,1060# | 0,1034 |
| Local right central | 0,1076 | 0,1086 |
| Local right frontal | 0,1335# | 0,1332 |
| Local right occipital | 0,1656# | 0,1560 |
| Local right parietal | 0,1873# | 0,1795 |
| Local right temporal | 0,0933# | 0,0930 |

A # indicates higher SL-values for the T1DM- patients.

**Table 5.** The effect of age and depressive symptoms on cognitive functioning and Functional Connectivity

|  | Roy’s Largest Root *P*-value | |
| --- | --- | --- |
|  | Age | Depressive symptoms |
| MANCOVA: |  |  |
| - Cognitive functioning | 0.026* | 0.108 |
| Repeated measures: |  |  |
| - Delta intra hemispheric | 0.217 | 0.295 |
| - Delta inter hemispheric | 0.460 | 0.208 |
| - Delta local hemispheric | 0.139 | 0.135 |
| - Theta intra hemispheric | 0.221 | 0.936 |
| - Theta inter hemispheric | 0.116 | 0.425 |
| - Theta local hemispheric | 0.321 | 0.028* |
| - Lower alpha intra hemispheric | 0.560 | 0.109 |
| - Lower alpha inter hemispheric | 0.072 | 0.733 |
| - Lower alpha local hemispheric | 0.468 | 0.406 |
| - Upper alpha intra hemispheric | 0.437 | 0.742 |
| - Upper alpha inter hemispheric | 0.403 | 0.704 |
| - Upper alpha local hemispheric | 0.526 | 0.753 |
| - Beta intra hemispheric | 0.131 | 0.994 |
| - Beta inter hemispheric | 0.249 | 0.769 |
| - Beta local hemispheric | 0.606 | 0.958 |
| - Lower gamma intra hemispheric | 0.128 | 0.552 |
| - Lower gamma inter hemispheric | 0.243 | 0.983 |
| - Lower gamma local hemispheric | 0.057 | 0.994 |
| - Upper gamma intra hemispheric | 0.007* | 0.542 |
| - Upper gamma inter hemispheric | 0.416 | 0.636 |
| - Upper gamma local hemispheric | 0.340 | 0.858 |

A * indicates significant effects of either age or depressive symptoms on that particular test.
